# Supplementary material for: β-Cyclodextrin Inclusion Complexes with Catechol-Containing Antioxidants Protocatechuic Aldehyde and Protocatechuic Acid—An Atomistic Perspective on Structural and Thermodynamic Stabilities
Source: MDPI journal article supplement (doi:10.3390/molecules26123574), 2021-06-11
Supplement: s1 [file s1]

## Supplementary Materials

### $\beta$ -Cyclodextrin Inclusion Complexes with Catechol-Containing Antioxidants Protocatechuic Aldehyde and Protocatechuic Acid—An Atomistic Perspective on Structural and Thermodynamic Stabilities

Thammarat Aree

Department of Chemistry, Faculty of Science, Chulalongkorn University, Bangkok 10330, Thailand;  
Tel. +66-2-2187584; Fax +66-2-2187598; E-mail: athammar@chula.ac.th

#### Supplementary Materials Available:

##### I. Crystallographic Data

**Table S1.** X-ray Single Crystal Data Collection and Refinement Statistics of **1** and **2**.

**Table S2.** Comparison of  $\beta$ -CD Geometrical Parameters in **1**, **2**,  $\beta$ -CD $\cdot$ 12H<sub>2</sub>O and  $\beta$ -CD $\cdot$ (-)-epicatechin $\cdot$ 4.2H<sub>2</sub>O.

**Table S3.** O–H $\cdots$ O Hydrogen Bonds in  $\beta$ -CD $\cdot$ PCAL $\cdot$ 6H<sub>2</sub>O (**1**).

**Table S4.** O–H $\cdots$ O Hydrogen Bonds in  $\beta$ -CD $\cdot$ PCAC $\cdot$ 6H<sub>2</sub>O (**2**).

##### II. Computational Data

**Fig. S1.** Inclusion Complexes of (a)  $\beta$ -CD–PCAL and (b)  $\beta$ -CD–PCAC, Derived from DFT Complete-Geometry Optimization in the Gas Phase.

**Table S5.** O–H $\cdots$ O Hydrogen Bonds in  $\beta$ -CD–PCAL and  $\beta$ -CD–PCAC Inclusion Complexes from DFT Full-Geometry Optimization.

**Table S6.** Stabilization and Interaction Energies of  $\beta$ -CD–PCAL and  $\beta$ -CD–PCAC Complexes Compared to Other  $\beta$ -CD–3,4-dihydroxybenzene Complexes from DFT Full-Geometry Optimization.

##### III. References

## I. Crystallographic Data

**Table S1.** X-ray Single Crystal Data Collection and Refinement Statistics of **1** and **2**.

|                                                                                                   | <b>1</b><br>β-CD–Protocatechuic aldehyde                                                                                       | <b>2</b><br>β-CD–Protocatechuic acid                                                                                           |
|---------------------------------------------------------------------------------------------------|--------------------------------------------------------------------------------------------------------------------------------|--------------------------------------------------------------------------------------------------------------------------------|
| Abbreviated formula                                                                               | β-CD·PCAL·6H <sub>2</sub> O                                                                                                    | β-CD·PCAC·6H <sub>2</sub> O                                                                                                    |
| Chemical formula                                                                                  | (C <sub>6</sub> H <sub>10</sub> O <sub>5</sub> ) <sub>7</sub> ·C <sub>7</sub> H <sub>6</sub> O <sub>3</sub> ·6H <sub>2</sub> O | (C <sub>6</sub> H <sub>10</sub> O <sub>5</sub> ) <sub>7</sub> ·C <sub>7</sub> H <sub>6</sub> O <sub>4</sub> ·6H <sub>2</sub> O |
| Formula weight                                                                                    | 1381.19                                                                                                                        | 1397.19                                                                                                                        |
| Crystal habit, color                                                                              | Thin plate, colorless                                                                                                          | Thin plate, colorless                                                                                                          |
| Crystal size [mm]                                                                                 | 0.02 × 0.24 × 0.32                                                                                                             | 0.02 × 0.14 × 0.40                                                                                                             |
| Crystal system, space group                                                                       | Monoclinic, <i>P</i> 2 <sub>1</sub> (No. 4)                                                                                    | Monoclinic, <i>P</i> 2 <sub>1</sub> (No. 4)                                                                                    |
| Unit cell constants                                                                               |                                                                                                                                |                                                                                                                                |
| <i>a</i> [Å]                                                                                      | 15.4213(11)                                                                                                                    | 12.5165(7)                                                                                                                     |
| <i>b</i> [Å]                                                                                      | 10.0440(7)                                                                                                                     | 19.0287(12)                                                                                                                    |
| <i>c</i> [Å]                                                                                      | 21.2795(15)                                                                                                                    | 14.0626(8)                                                                                                                     |
| <i>α</i> [°]                                                                                      | 90                                                                                                                             | 90                                                                                                                             |
| <i>β</i> [°]                                                                                      | 110.281(2)                                                                                                                     | 109.656(2)                                                                                                                     |
| <i>γ</i> [°]                                                                                      | 90                                                                                                                             | 90                                                                                                                             |
| <i>V</i> [Å <sup>3</sup> ]                                                                        | 3091.7(4)                                                                                                                      | 3154.2(3)                                                                                                                      |
| <i>Z</i>                                                                                          | 2                                                                                                                              | 2                                                                                                                              |
| <i>D<sub>c</sub></i> [g cm <sup>−3</sup> ]                                                        | 1.484                                                                                                                          | 1.471                                                                                                                          |
| <i>μ</i> [mm <sup>−1</sup> ]                                                                      | 0.133                                                                                                                          | 0.132                                                                                                                          |
| <i>F</i> (000)                                                                                    | 1468                                                                                                                           | 1484                                                                                                                           |
| Diffractometer                                                                                    | APEXII Kappa CCD (Bruker)                                                                                                      | APEXII Kappa CCD (Bruker)                                                                                                      |
| Wavelength [Å]                                                                                    | MoK <sub>α</sub> , 0.71073                                                                                                     | MoK <sub>α</sub> , 0.71073                                                                                                     |
| <i>T</i> [K]                                                                                      | 296(2)                                                                                                                         | 296(2)                                                                                                                         |
| Data collection                                                                                   | <i>ω</i> – <i>φ</i> scan, 1.2° step, 8 s expose                                                                                | <i>ω</i> – <i>φ</i> scan, 1.2° step, 10 s expose                                                                               |
| Frames collected                                                                                  | 600                                                                                                                            | 680                                                                                                                            |
| <i>θ</i> range [°]                                                                                | 1.41–30.67                                                                                                                     | 1.54–30.61                                                                                                                     |
| Resolution [Å]                                                                                    | 0.70                                                                                                                           | 0.70                                                                                                                           |
| Completeness [%], <i>R</i> <sub>int</sub>                                                         | 99.4, 0.0990                                                                                                                   | 99.8, 0.0809                                                                                                                   |
| Reflns collected / unique / > 2 <i>σ</i> ( <i>I</i> )                                             | 60310 / 18989 / 7817                                                                                                           | 55384 / 19288 / 9845                                                                                                           |
| Data / restraints / parameters                                                                    | 18989 / 18 / 860                                                                                                               | 19288 / 11 / 871                                                                                                               |
| <i>R</i> <sub>1</sub> , <i>wR</i> <sub>2</sub> [ <i>I</i> > 2 <i>σ</i> ( <i>I</i> )] <sup>a</sup> | 0.0620, 0.1100                                                                                                                 | 0.0602, 0.0879                                                                                                                 |
| <i>R</i> <sub>1</sub> , <i>wR</i> <sub>2</sub> [all data] <sup>b</sup> , GoF                      | 0.1927, 0.1527, 0.948                                                                                                          | 0.1509, 0.1134, 0.974                                                                                                          |
| Δ <i>ρ</i> <sub>min</sub> , Δ <i>ρ</i> <sub>max</sub> (e Å <sup>−3</sup> )                        | −0.28, 0.38                                                                                                                    | −0.34, 0.24                                                                                                                    |
| CCDC number                                                                                       | 2075723                                                                                                                        | 2075722                                                                                                                        |

<sup>a</sup>  $R = \sum ||F_o| - |F_c|| / \sum |F_o|$ .

<sup>b</sup>  $wR = \sum \{w(F_o^2 - F_c^2)^2 / \sum w(F_o^2)^2\}^{1/2}$ .

**Table S2.** Comparison of  $\beta$ -CD Geometrical Parameters in **1**, **2**,  $\beta$ -CD·12H<sub>2</sub>O and  $\beta$ -CD·(–)-epicatechin·4.2H<sub>2</sub>O.<sup>a</sup>

| Residue<br><i>n</i> | Puckering <i>Q</i> [Å] <sup>b</sup> , $\theta$ [°] <sup>c</sup> |          |                                       |                                      | Tilt angle [°] <sup>d</sup> |          |                                       |                                      | O4 deviation [Å] <sup>e</sup> |           |                                       |                                      | O4( <i>n</i> )...O4( <i>n</i> – 1), O4( <i>n</i> )...centroid [Å] |              |                                       |                                      |
|---------------------|-----------------------------------------------------------------|----------|---------------------------------------|--------------------------------------|-----------------------------|----------|---------------------------------------|--------------------------------------|-------------------------------|-----------|---------------------------------------|--------------------------------------|-------------------------------------------------------------------|--------------|---------------------------------------|--------------------------------------|
|                     | <b>1</b>                                                        | <b>2</b> | <b><math>\beta</math>-CD<br/>·12W</b> | <b><math>\beta</math>-CD<br/>·EC</b> | <b>1</b>                    | <b>2</b> | <b><math>\beta</math>-CD<br/>·12W</b> | <b><math>\beta</math>-CD<br/>·EC</b> | <b>1</b>                      | <b>2</b>  | <b><math>\beta</math>-CD<br/>·12W</b> | <b><math>\beta</math>-CD<br/>·EC</b> | <b>1</b>                                                          | <b>2</b>     | <b><math>\beta</math>-CD<br/>·12W</b> | <b><math>\beta</math>-CD<br/>·EC</b> |
| 1                   | 0.574(6)                                                        | 0.573(4) | 0.571                                 | 0.557(2)                             |                             |          |                                       |                                      |                               |           |                                       |                                      | 4.479(5)                                                          | 4.425(4)     | 4.247                                 | 4.498(2)                             |
|                     | 3.1(6)                                                          | 5.4(4)   | 3.9                                   | 4.9(3)                               | 22.9(3)                     | 23.1(1)  | 20.3                                  | 33.7(1)                              | –0.150(3)                     | 0.125(2)  | –0.115                                | –0.199(1)                            | 5.192                                                             | 4.531        | 5.184                                 | 4.827                                |
| 2                   | 0.543(6)                                                        | 0.562(4) | 0.567                                 | 0.578(2)                             |                             |          |                                       |                                      |                               |           |                                       |                                      | 4.182(5)                                                          | 4.415(4)     | 4.338                                 | 4.322(2)                             |
|                     | 6.0(6)                                                          | 0.0(4)   | 3.7                                   | 3.2(2)                               | 14.2(3)                     | 11.3(1)  | 6.4                                   | 1.9(1)                               | 0.290(3)                      | 0.313(2)  | –0.196                                | –0.073(1)                            | 5.319                                                             | 5.300        | 4.913                                 | 5.435                                |
| 3                   | 0.585(6)                                                        | 0.572(4) | 0.570                                 | 0.565(2)                             |                             |          |                                       |                                      |                               |           |                                       |                                      | 4.363(5)                                                          | 4.117(4)     | 4.489                                 | 4.209(2)                             |
|                     | 1.7(6)                                                          | 7.5(4)   | 7.6                                   | 4.9(2)                               | 3.3(2)                      | 11.8(2)  | 15.0                                  | 14.6(1)                              | 0.050(3)                      | –0.392(2) | 0.192                                 | 0.087(1)                             | 4.638                                                             | 5.213        | 4.981                                 | 5.075                                |
| 4                   | 0.592(6)                                                        | 0.558(5) | 0.583                                 | 0.582(2)                             |                             |          |                                       |                                      |                               |           |                                       |                                      | 4.570(5)                                                          | 4.425(4)     | 4.392                                 | 4.626(2)                             |
|                     | 7.7(6)                                                          | 3.7(5)   | 3.0                                   | 8.8(2)                               | 18.5(3)                     | 30.3(2)  | 26.2                                  | 30.6(1)                              | –0.378(3)                     | –0.022(2) | 0.091                                 | 0.124(1)                             | 4.896                                                             | 4.608        | 5.153                                 | 4.632                                |
| 5                   | 0.543(6)                                                        | 0.573(4) | 0.559                                 | 0.561(2)                             |                             |          |                                       |                                      |                               |           |                                       |                                      | 4.154(5)                                                          | 4.562(4)     | 4.286                                 | 4.403(2)                             |
|                     | 9.7(6)                                                          | 9.5(4)   | 3.9                                   | 6.7(2)                               | 24.5(2)                     | 8.9(2)   | 10.8                                  | 19.7(1)                              | 0.188(3)                      | 0.312(2)  | –0.195                                | –0.180(1)                            | 5.382                                                             | 5.051        | 5.122                                 | 5.171                                |
| 6                   | 0.550(6)                                                        | 0.563(4) | 0.596                                 | 0.545(2)                             |                             |          |                                       |                                      |                               |           |                                       |                                      | 4.318(5)                                                          | 4.309(4)     | 4.443                                 | 4.263(2)                             |
|                     | 3.5(6)                                                          | 1.9(4)   | 1.4                                   | 5.6(2)                               | 3.4(3)                      | 11.6(2)  | 7.9                                   | 4.6(1)                               | 0.223(3)                      | –0.095(2) | –0.053                                | –0.084(1)                            | 4.960                                                             | 5.356        | 4.856                                 | 5.397                                |
| 7                   | 0.569(6)                                                        | 0.573(4) | 0.579                                 | 0.574(2)                             |                             |          |                                       |                                      |                               |           |                                       |                                      | 4.523(5)                                                          | 4.289(4)     | 4.452                                 | 4.278(2)                             |
|                     | 8.1(6)                                                          | 2.6(4)   | 2.0                                   | 3.7(2)                               | 20.5(3)                     | 11.4(3)  | 10.7                                  | 6.9(1)                               | –0.224(3)                     | –0.240(2) | 0.276                                 | 0.325(1)                             | 4.736                                                             | 4.963        | 5.054                                 | 4.581                                |
|                     |                                                                 |          |                                       |                                      |                             |          |                                       |                                      |                               |           |                                       |                                      | <i>0.416</i> <sup>f</sup>                                         | <i>0.445</i> | <i>0.242</i>                          | <i>0.417</i>                         |
|                     |                                                                 |          |                                       |                                      |                             |          |                                       |                                      |                               |           |                                       |                                      | <i>0.744</i> <sup>f</sup>                                         | <i>0.825</i> | <i>0.328</i>                          | <i>0.854</i>                         |
|                     |                                                                 |          |                                       |                                      |                             |          |                                       |                                      |                               |           |                                       |                                      | <i>0.874</i> <sup>f</sup>                                         | <i>0.876</i> | <i>0.870</i>                          | <i>0.876</i>                         |

<sup>a</sup>  $\beta$ -CD·12H<sub>2</sub>O [1] and  $\beta$ -CD·(–)-epicatechin·4.2H<sub>2</sub>O [2].<sup>b,c</sup> An ideal cyclohexane chair (for  $R(\text{C}–\text{C}) = 1.54$  Å) has puckering amplitude  $Q = 0.63$  Å and angle describing the polar position  $\theta = 0^\circ$  [3].<sup>d</sup> Interplanar angle of the plane through C1(*n*), C4(*n*), O4(*n*) and O4(*n* – 1) against the O4 plane.<sup>e</sup> Deviation of glycosidic O4 atoms from the least-squares plane through the seven O4 atoms.<sup>f</sup> Ranges of the O4(*n*)...O4(*n* – 1), O4(*n*)...centroid distances and the average of their ratios are in *italics*; for an ideal heptagon, the ratio is 0.868.<sup>g</sup> Endocyclic torsion angles  $\phi$  and  $\psi$  at glycosidic O4, defined as O5(*n* + 1)–C1(*n* + 1)–O4(*n*)–C4(*n*) and C1(*n* + 1)–O4(*n*)–C4(*n*)–C5(*n*), respectively.<sup>h</sup> Averages of  $\phi$  and  $\psi$  are in *italics*; for the CD roundness, the sum of averages should be nearly zero [4].<sup>i</sup> Exocyclic torsion angles  $\chi$  and  $\omega$  are defined as C4–C5–C6–O6 and O5–C5–C6–O6, respectively.

**Table S2.** Continued.

| Residue<br><i>n</i> | O3( <i>n</i> )...O2( <i>n</i> + 1) distance [Å] |          |                     |                    | Torsion angles $\phi^g, \psi^g$ [°] |               |                     |                    | Torsion angles $\chi^i, \omega^i$ [°] |           |                     |                    |
|---------------------|-------------------------------------------------|----------|---------------------|--------------------|-------------------------------------|---------------|---------------------|--------------------|---------------------------------------|-----------|---------------------|--------------------|
|                     | 1                                               | 2        | $\beta$ -CD<br>•12W | $\beta$ -CD<br>•EC | 1                                   | 2             | $\beta$ -CD<br>•12W | $\beta$ -CD<br>•EC | 1                                     | 2         | $\beta$ -CD<br>•12W | $\beta$ -CD<br>•EC |
| 1                   |                                                 |          |                     |                    | 108.1(5)                            | 116.2(4)      | 120.0               | 129.1(2)           | 47.6(6)                               | 177.8(3)  | −175.4              | 55.7(3)            |
|                     | 2.811(6)                                        | 2.731(4) | 2.855               | 3.346(3)           | −113.4(5)                           | −103.1(4)     | −109.8              | −97.4(2)           | −72.7(6)                              | 60.4(4)   | 64.7                | −64.5(2)           |
| 2                   |                                                 |          |                     |                    | 106.1(4)                            | 103.9(4)      | 103.0               | 90.1(2)            | 61.9(6)                               | 57.0(4)   | 52.1                | 60.7(2)            |
|                     | 2.939(5)                                        | 2.893(4) | 2.862               | 2.828(3)           | −117.6(5)                           | −141.1(3)     | −125.7              | −131.9(2)          | −59.4(6)                              | −62.7(4)  | −62.9               | −60.9(2)           |
| 3                   |                                                 |          |                     |                    | 102.5(5)                            | 115.4(4)      | 119.3               | 117.1(2)           | 58.3(6)                               | −168.0(3) | −169.4              | −167.8(2)          |
|                     | 2.896(5)                                        | 2.841(5) | 2.957               | 3.246(3)           | −112.2(5)                           | −105.8(4)     | −95.9               | −105.9(2)          | −63.5(6)                              | 70.5(4)   | 70.5                | 69.8(2)            |
| 4                   |                                                 |          |                     |                    | 115.1(5)                            | 122.6(4)      | 110.5               | 105.9(2)           | 45.9(7)                               | 55.7(5)   | −173.9              | 54.2(3)            |
|                     | 2.810(6)                                        | 2.982(5) | 2.875               | 2.833(3)           | −102.8(5)                           | −102.8(4)     | −106.6              | −96.5(2)           | −73.7(6)                              | −64.2(5)  | 71.0                | −64.7(3)           |
| 5                   |                                                 |          |                     |                    | 117.4(4)                            | 99.2(4)       | 102.5               | 102.7(2)           | −171.6(5)                             | 56.9(5)   | 58.7                | 53.5(2)            |
|                     | 3.133(6)                                        | 3.056(4) | 2.902               | 2.924(2)           | −111.4(5)                           | −125.6(4)     | −121.1              | −118.4(2)          | 67.1(6)                               | −63.7(4)  | −60.8               | −66.8(2)           |
| 6                   |                                                 |          |                     |                    | 97.9(5)                             | 101.4(4)      | 107.7               | 100.7(2)           | 53.4(6)                               | 61.6(5)   | 57.0                | 58.7(3)            |
|                     | 2.992(6)                                        | 2.729(4) | 2.783               | 2.765(2)           | −120.4(5)                           | −109.9(4)     | −109.4              | −121.5(2)          | −66.7(5)                              | −60.3(4)  | −61.0               | −62.7(2)           |
| 7                   |                                                 |          |                     |                    | 114.0(5)                            | 112.5(4)      | 110.7               | 111.6(2)           | 54.9(7)                               | −177.2(3) | 50.7                | 48.9(2)            |
|                     | 2.803(6)                                        | 2.802(4) | 2.770               | 2.762(2)           | −95.4(5)                            | −116.1(4)     | −114.1              | −118.1(2)          | −65.1(6)                              | 62.0(4)   | −71.0               | −72.5(2)           |
|                     |                                                 |          |                     |                    | <i>108.7<sup>h</sup></i>            | <i>110.2</i>  | <i>110.5</i>        | <i>108.2</i>       |                                       |           |                     |                    |
|                     |                                                 |          |                     |                    | <i>−110.5<sup>h</sup></i>           | <i>−114.9</i> | <i>−111.8</i>       | <i>−112.8</i>      |                                       |           |                     |                    |
|                     |                                                 |          |                     |                    | <i>−1.7<sup>h</sup></i>             | <i>−4.7</i>   | <i>−1.3</i>         | <i>−4.6</i>        |                                       |           |                     |                    |

<sup>a</sup>  $\beta$ -CD·12H<sub>2</sub>O [1] and  $\beta$ -CD·(−)-epicatechin·4.2H<sub>2</sub>O [2].

<sup>b,c</sup> An ideal cyclohexane chair (for  $R(\text{C}–\text{C}) = 1.54 \text{ Å}$ ) has puckering amplitude  $Q = 0.63 \text{ Å}$  and angle describing the polar position  $\theta = 0^\circ$  [3].

<sup>d</sup> Interplanar angle of the plane through C1(*n*), C4(*n*), O4(*n*) and O4(*n* − 1) against the O4 plane.

<sup>e</sup> Deviation of glycosidic O4 atoms from the least-squares plane through the seven O4 atoms.

<sup>f</sup> Ranges of the O4(*n*)...O4(*n* − 1), O4(*n*)...centroid distances and the average of their ratios are in *italics*; for an ideal heptagon, the ratio is 0.868.

<sup>g</sup> Endocyclic torsion angles  $\phi$  and  $\psi$  at glycosidic O4, defined as O5(*n* + 1)–C1(*n* + 1)–O4(*n*)–C4(*n*) and C1(*n* + 1)–O4(*n*)–C4(*n*)–C5(*n*), respectively.

<sup>h</sup> Averages of  $\phi$  and  $\psi$  are in *italics*; for the CD roundness, the sum of averages should be nearly zero [4].

<sup>i</sup> Exocyclic torsion angles  $\chi$  and  $\omega$  are defined as C4–C5–C6–O6 and O5–C5–C6–O6, respectively.

**Table S3.** O–H...O Hydrogen Bonds in  $\beta$ -CD-PCAL·6H<sub>2</sub>O (**1**) [Å, °].

| Interaction                               | O–H  | O...O    | $\angle$ (OHO) | Interaction                                      | O–H  | O...O    | $\angle$ (OHO) |
|-------------------------------------------|------|----------|----------------|--------------------------------------------------|------|----------|----------------|
| $\beta$ -CD– $\beta$ -CD <sup>a</sup>     |      |          |                |                                                  |      |          |                |
| O21–H...O37                               | 0.82 | 2.803(6) | 163.3          | O4W–H1...O63                                     | 0.95 | 2.687(6) | 175.9          |
| O22–H...O31                               | 0.82 | 2.811(6) | 159.1          | O5W–H1...O34 <sup>x</sup>                        | 0.95 | 2.929(6) | 172.3          |
| O32–H...O23                               | 0.82 | 2.939(5) | 177.5          | O6W–H2...O64                                     | 0.96 | 2.815(7) | 135.7          |
| O24–H...O33                               | 0.82 | 2.896(5) | 165.4          | O64–H...O5W                                      | 0.82 | 2.725(7) | 171.2          |
| O34–H...O25                               | 0.82 | 2.810(6) | 167.3          | O25–H...O4W <sup>vi</sup>                        | 0.82 | 2.709(5) | 173.0          |
| O35–H...O26                               | 0.82 | 3.133(6) | 170.8          | O1W–H2...O25 <sup>iii</sup>                      | 0.94 | 2.891(5) | 136.1          |
| O27–H...O36                               | 0.82 | 2.993(6) | 162.8          | O65–H...O1W                                      | 0.82 | 2.741(6) | 115.9          |
| O31–H...O51 <sup>i c</sup>                | 0.82 | 3.208(6) | 129.7          | O6W–H1...O65                                     | 0.93 | 2.775(6) | 155.1          |
| O61–H...O21 <sup>ii</sup>                 | 0.82 | 2.822(6) | 141.4          | O26–H...O3W <sup>viii</sup>                      | 0.82 | 2.781(6) | 146.0          |
| O33–H...O61 <sup>v</sup>                  | 0.82 | 2.862(6) | 150.5          | O66–H...O3W <sup>vii</sup>                       | 0.82 | 2.848(6) | 138.3          |
| O63–H...O56 <sup>iv</sup>                 | 0.82 | 3.098(6) | 128.7          | O2W–H1...O27 <sup>i</sup>                        | 0.94 | 2.962(6) | 124.9          |
| O63–H...O66 <sup>iv</sup>                 | 0.82 | 2.766(6) | 127.0          | <i>PCAL–<math>\beta</math>-CD/H<sub>2</sub>O</i> |      |          |                |
| O36–H...O22 <sup>i</sup>                  | 0.82 | 2.727(6) | 151.5          | O2L–H...O1L                                      | 0.82 | 2.700(6) | 114.1          |
| O37–H...O23 <sup>ii</sup>                 | 0.82 | 3.053(6) | 129.6          | O1L–H...O1W                                      | 0.82 | 2.658(6) | 177.7          |
| O67–H...O26 <sup>iii</sup>                | 0.82 | 2.766(6) | 163.4          | O2L–H...O34 <sup>iii</sup>                       | 0.82 | 2.874(6) | 166.0          |
| $\beta$ -CD–H <sub>2</sub> O <sup>b</sup> |      |          |                | O31–H...O3L <sup>ii</sup>                        | 0.82 | 2.842(6) | 134.4          |
| O2W–H2...O32 <sup>ix</sup>                | 0.96 | 2.826(6) | 141.6          | <i>H<sub>2</sub>O–H<sub>2</sub>O</i>             |      |          |                |
| O3W–H2...O62                              | 0.95 | 2.847(7) | 144.2          | O3W–H1...O6W <sup>x</sup>                        | 0.95 | 2.829(7) | 121.4          |
| O62–H...O2W <sup>iii</sup>                | 0.82 | 3.102(7) | 144.2          | O4W–H2...O6W <sup>vi</sup>                       | 0.95 | 2.919(6) | 168.3          |
| O23–H...O2W                               | 0.82 | 2.710(6) | 176.2          | O5W–H2...O4W                                     | 0.95 | 3.092(7) | 148.8          |

<sup>a</sup>  $\beta$ -CD without doubly disordered O6–H groups.<sup>b</sup> Six fully occupied water molecules.<sup>c</sup> Equivalent positions: (i)  $-x + 1, y + 0.5, -z + 2$ ; (ii)  $-x + 1, y - 0.5, -z + 2$ ; (iii)  $x, y - 1, z$ ; (iv)  $x + 1, y, z$ ; (v)  $x, y + 1, z$ ; (vi)  $-x + 1, y + 0.5, -z + 1$ ; (vii)  $x - 1, y, z$ ; (viii)  $x - 1, y + 1, z$ ; (ix)  $-x + 2, y + 0.5, -z + 2$ ; (x)  $-x + 1, y - 0.5, -z + 1$ .

**Table S4.** O–H...O Hydrogen Bonds in  $\beta$ -CD-PCAC·6H<sub>2</sub>O (**2**) [Å, °].

| Interaction                               | O–H  | O...O    | $\angle$ (OHO) | Interaction                                      | O–H  | O...O    | $\angle$ (OHO) |
|-------------------------------------------|------|----------|----------------|--------------------------------------------------|------|----------|----------------|
| $\beta$ -CD– $\beta$ -CD <sup>a</sup>     |      |          |                | O2W–H1...O63                                     | 0.96 | 2.911(5) | 156.3          |
| O21–H...O37                               | 0.82 | 2.802(4) | 157.9          | O3W–H2...O63 <sup>ix</sup>                       | 0.96 | 2.845(5) | 154.5          |
| O31–H...O22                               | 0.82 | 2.731(4) | 173.0          | O4W–H1...O64 <sup>ix</sup>                       | 0.97 | 2.785(5) | 168.5          |
| O23–H...O32                               | 0.82 | 2.893(4) | 164.1          | O4W–H2...O55 <sup>ix</sup>                       | 0.95 | 2.965(5) | 115.6          |
| O24–H...O33                               | 0.82 | 2.841(5) | 165.6          | O5W–H1...O65                                     | 0.96 | 2.757(5) | 171.1          |
| O34–H...O25                               | 0.82 | 2.982(5) | 169.4          | O26–H...O5W <sup>vii</sup>                       | 0.82 | 2.975(5) | 157.3          |
| O35–H...O26                               | 0.82 | 3.056(4) | 175.8          | O6W–H1...O36                                     | 0.96 | 2.768(5) | 173.6          |
| O36–H...O27                               | 0.82 | 2.729(4) | 158.4          | O3W–H1...O66                                     | 0.96 | 2.754(5) | 174.5          |
| O61–H...O23 <sup>ic</sup>                 | 0.82 | 2.934(4) | 165.2          | O27–H...O1W <sup>ix</sup>                        | 0.82 | 2.803(5) | 164.2          |
| O62–H...O21 <sup>ii</sup>                 | 0.82 | 2.817(4) | 153.9          | O1W–H1...O67                                     | 0.96 | 2.864(4) | 154.6          |
| O33–H...O67 <sup>iii</sup>                | 0.82 | 2.765(4) | 174.7          | <i>PCAC–<math>\beta</math>-CD/H<sub>2</sub>O</i> |      |          |                |
| O63–H...O31 <sup>ii</sup>                 | 0.82 | 2.790(4) | 158.9          | O1D–H...O2D                                      | 0.82 | 2.703(5) | 108.7          |
| O25–H...O52 <sup>v</sup>                  | 0.82 | 2.855(4) | 161.0          | O1D–H...O1W                                      | 0.82 | 2.705(5) | 168.9          |
| O65–H...O21 <sup>vi</sup>                 | 0.82 | 2.767(4) | 169.1          | O2D–H...O2W                                      | 0.82 | 2.670(6) | 167.3          |
| O66–H...O52 <sup>viii</sup>               | 0.82 | 3.073(4) | 120.6          | O64–H...O3D <sup>iv</sup>                        | 0.82 | 2.937(6) | 167.4          |
| O66–H...O62 <sup>viii</sup>               | 0.82 | 2.849(5) | 167.0          | O67–H...O3D <sup>i</sup>                         | 0.82 | 2.767(5) | 154.3          |
| O37–H...O24 <sup>x</sup>                  | 0.82 | 2.712(4) | 149.1          | O4D–H...O3W <sup>iii</sup>                       | 0.82 | 2.631(5) | 171.5          |
| $\beta$ -CD–H <sub>2</sub> O <sup>b</sup> |      |          |                | <i>H<sub>2</sub>O–H<sub>2</sub>O</i>             |      |          |                |
| O1W–H2...O61                              | 0.96 | 3.044(5) | 169.6          | O2W–H2...O6W <sup>vi</sup>                       | 0.96 | 2.869(5) | 162.2          |
| O6W–H2...O61 <sup>ix</sup>                | 0.96 | 2.857(5) | 174.3          | O4W–H2...O5W <sup>ix</sup>                       | 0.95 | 2.829(6) | 149.5          |
| O22–H...O4W <sup>iii</sup>                | 0.82 | 2.841(5) | 166.8          | O5W–H2...O6W <sup>xi</sup>                       | 0.96 | 2.936(5) | 166.7          |
| O32–H...O4W <sup>iii</sup>                | 0.82 | 2.678(5) | 167.9          |                                                  |      |          |                |

<sup>a</sup>  $\beta$ -CD without doubly disordered O6–H groups.<sup>b</sup> Six fully occupied water molecules.<sup>c</sup> Equivalent positions: (i)  $x - 1, y, z$ ; (ii)  $-x + 2, y - 0.5, -z + 2$ ; (iii)  $x + 1, y, z$ ; (iv)  $-x + 2, y - 0.5, -z + 1$ ; (v)  $x, y, z - 1$ ; (vi)  $-x + 1, y - 0.5, -z + 1$ ; (vii)  $-x + 1, y + 0.5, -z$ ; (viii)  $x - 1, y, z - 1$ ; (ix)  $-x + 1, y + 0.5, -z + 1$ ; (x)  $-x + 2, y + 0.5, -z + 1$ ; (xi)  $-x + 1, y - 0.5, -z$ .

## II. Computational Data

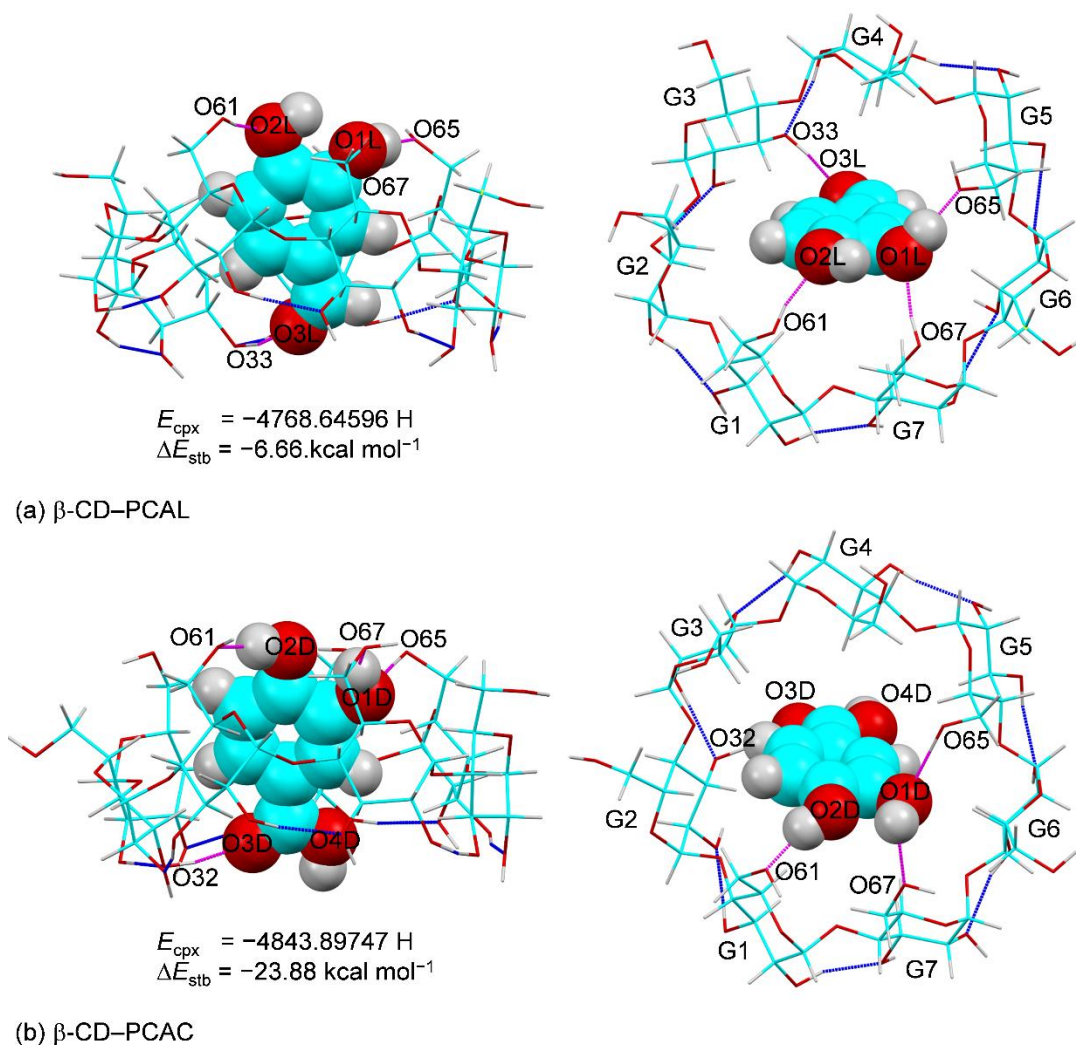

**Fig. S1.** Inclusion complexes of (a)  $\beta$ -CD-PCAL and (b)  $\beta$ -CD-PCAC, derived from DFT complete-geometry optimization in the gas phase; side view (left) and top view (right). For better comparison, the energy of complex ( $E_{\text{cpx}}$ ) and stabilization energy ( $\Delta E_{\text{stb}}$ ) are given; see also Tables S5. The intramolecular  $\text{O}3(n)\cdots\text{O}2(n+1)$  H-bonds of  $\beta$ -CD and host-guest  $\text{O}-\text{H}\cdots\text{O}$  H-bonds are indicated by blue and magenta connecting lines, respectively.

**Table S5.** O–H...O Hydrogen Bonds in  $\beta$ -CD-PCAL and  $\beta$ -CD-PCAC Inclusion Complexes from DFT Full-Geometry Optimization [ $\text{\AA}$ ,  $^\circ$ ].<sup>a</sup>

| Interaction                   | O–H  | O...O       | $\angle(\text{OHO})$ | Interaction       | O–H  | O...O | $\angle(\text{OHO})$ |
|-------------------------------|------|-------------|----------------------|-------------------|------|-------|----------------------|
| $\beta$ -CD-PCAL <sup>b</sup> |      |             |                      |                   |      |       |                      |
| $\beta$ -CD- $\beta$ -CD      |      | $\beta$ -CD | <u>conformation</u>  | PCAL- $\beta$ -CD |      |       |                      |
| O21–H...O37                   | 0.98 | 2.82        | Distorted round      | O2L–H...O1L       | 0.98 | 2.69  | 114.4                |
| O22–H...O31                   | 0.98 | 2.84        |                      | O61–H...O2L       | 0.97 | 2.95  | 164.7                |
| O32–H...O23                   | 0.98 | 2.86        |                      | O33–H...O3L       | 0.98 | 2.93  | 164.7                |
| O24–H...O33                   | 0.98 | 2.94        |                      | O67–H...O1L       | 0.97 | 3.02  | 169.3                |
| O34–H...O25                   | 0.98 | 2.92        |                      | O1L–H...O65       | 0.99 | 2.74  | 177.8                |
| O35–H...O26                   | 0.98 | 2.90        |                      |                   |      |       |                      |
| O27–H...O36                   | 0.98 | 3.26        |                      |                   |      |       |                      |
| $\beta$ -CD-PCAC <sup>b</sup> |      |             |                      |                   |      |       |                      |
| $\beta$ -CD- $\beta$ -CD      |      | Distorted   | round                | PCAC- $\beta$ -CD |      |       |                      |
| O21–H...O37                   | 0.98 | 2.87        |                      | O1D–H...O2D       | 0.99 | 2.69  | 108.7                |
| O31–H...O22                   | 0.98 | 2.87        |                      | O65–H...O1D       | 0.97 | 3.02  | 177.5                |
| O23–H...O32                   | 0.98 | 2.92        |                      | O1D–H...O67       | 0.99 | 3.01  | 145.1                |
| O24–H...O33                   | 0.98 | 2.97        |                      | O2D–H...O61       | 0.99 | 2.78  | 161.9                |
| O34–H...O25                   | 0.98 | 2.93        |                      | O32–H...O3D       | 0.98 | 2.90  | 169.4                |
| O35–H...O26                   | 0.98 | 2.94        |                      |                   |      |       |                      |
| O36–H...O27                   | 0.98 | 3.03        |                      |                   |      |       |                      |

<sup>a</sup> DFT energy minimization in vacuum at B3LYP/6–31+G\*/4–31G level, see also Fig. S1 and Table S6.

<sup>b</sup> X-ray-derived structures were used as starting models.



**Table S6.** Stabilization and Interaction Energies of  $\beta$ -CD-PCAL and  $\beta$ -CD-PCAC Complexes Compared to Other  $\beta$ -CD-3,4-dihydroxybenzene Complexes from DFT Full-Geometry Optimization. <sup>a</sup>

|                                                                      | $\beta$ -CD-PCAL | $\beta$ -CD-PCAC | $\beta$ -CD-HTY <sup>b</sup> | $\beta$ -CD-OLE <sup>b</sup> | $\beta$ -CD-CFA <sup>c</sup> | $\beta$ -CD-CGA <sup>c</sup> |
|----------------------------------------------------------------------|------------------|------------------|------------------------------|------------------------------|------------------------------|------------------------------|
| $E_{\text{cpx}}$ <sup>d</sup>                                        | -4768.64596      | -4843.89747      | -4809.11016                  | -6221.48698                  | -5569.72645                  | -4921.19194                  |
| $E_{\beta\text{-CD}_{\text{opt}}}$ <sup>e</sup>                      | -4272.97625      | -4272.95438      | -4272.95853                  | -4272.95892                  | -4272.96989                  | -4272.96123                  |
| $E_{\text{G}_{\text{opt}}}$                                          | -495.65910       | -570.90503       | -536.12216                   | -1948.47613                  | -1296.72905                  | -648.20786                   |
| $E_{\beta\text{-CD}_{\text{sp}}}$                                    | -4272.96945      | -4272.94828      | -4272.95412                  | -4272.94227                  | -4272.96725                  | -4272.95827                  |
| $E_{\text{G}_{\text{sp}}}$                                           | -495.65651       | -570.90054       | -536.11813                   | -1948.46783                  | -1296.72722                  | -648.20576                   |
| $\Delta E_{\text{stb}}$ [Hartree] <sup>f</sup>                       | -0.01061         | -0.03806         | -0.02948                     | -0.05193                     | -0.02751                     | -0.02285                     |
| $\Delta E_{\text{stb}}$ [kcal mol <sup>-1</sup> ]                    | -6.66            | -23.88           | -18.50                       | -32.58                       | -17.26                       | -14.34                       |
| $\Delta\Delta E_{\text{stb}}$ [kcal mol <sup>-1</sup> ] <sup>h</sup> | 25.92            | 8.7              | 14.08                        | 0                            | 15.32                        | 18.24                        |
| $\Delta E_{\text{int}}$ [Hartree] <sup>g</sup>                       | -0.02000         | -0.04865         | -0.03792                     | -0.07688                     | -0.02792                     | -0.03198                     |
| $\Delta E_{\text{int}}$ [kcal mol <sup>-1</sup> ]                    | -12.55           | -30.53           | -23.79                       | -48.24                       | -17.52                       | -20.07                       |
| $\Delta\Delta E_{\text{int}}$ [kcal mol <sup>-1</sup> ] <sup>i</sup> | 35.69            | 17.71            | 24.45                        | 0                            | 30.72                        | 28.17                        |
| No. of host-guest OH...O hydrogen bonds                              | 4                | 4                | 3                            | 6                            | 1                            | 2                            |

<sup>a</sup> DFT/B3LYP calculations in the gas phase with mixed basis sets 4-31G for C atoms and 6-31+G\* for O atoms were carried out using program GAUSSIAN09 [5]. X-ray-derived structures were used as starting models, see also Fig. S1 and Table S5.

<sup>b</sup> Ref. [6].

<sup>c</sup> Ref. [7].

<sup>d</sup> Original unit of  $E$  is Hartree [1 H = 627.5 kcal mol<sup>-1</sup>].

<sup>e</sup>  $E_{\beta\text{-CD}_{\text{opt}}}$  in vacuum of the uncomplexed  $\beta$ -CD·12H<sub>2</sub>O [1] is -4272.96662 H.

<sup>f,g</sup> Stabilization energy,  $\Delta E_{\text{stb}} = E_{\text{cpx}} - (E_{\beta\text{-CD}_{\text{opt}}} + E_{\text{G}_{\text{opt}}})$

Interaction energy,  $\Delta E_{\text{int}} = E_{\text{cpx}} - (E_{\beta\text{-CD}_{\text{sp}}} + E_{\text{G}_{\text{sp}}})$ , where  $E_{\text{cpx}}$ ,  $E_{\beta\text{-CD}_{\text{opt}}}$  and  $E_{\text{G}_{\text{opt}}}$  are the energies from full optimization of complex, host  $\beta$ -CD and guest PCAL/PCAC, respectively;  $E_{\beta\text{-CD}_{\text{sp}}}$  and  $E_{\text{G}_{\text{sp}}}$  are the corresponding single-point energies in the complexed states.

<sup>h,i</sup> Relative stabilization energy and relative interaction energy ( $\Delta\Delta E_{\text{stb}}$  and  $\Delta\Delta E_{\text{int}}$ ) calculated using the most stable complex  $\beta$ -CD-OLE [6] as a reference.

Note: No basis set superposition error (BSSE) correction is applied to the DFT-derived energies of the  $\beta$ -CD-catechol antioxidant complexes because the estimated energy differences ( $\Delta\Delta E_{\text{stb}}$  and  $\Delta\Delta E_{\text{int}}$ ) are sufficient to interpret the relative thermodynamic stabilities in relation to host-guest interactions and antioxidant properties.

### III. References

1. Lindner, K.; Saenger, W. Crystal and molecular structure of cyclohepta-amylose dodecahydrate. *Carbohydr. Res.* **1982**, *99*, 103–115. [https://doi.org/10.1016/S0008-6215\(00\)81901-1](https://doi.org/10.1016/S0008-6215(00)81901-1).
2. Aree, T.; Jongrungruangchok, S. Crystallographic evidence for  $\beta$ -cyclodextrin inclusion complexation facilitating the improvement of antioxidant activity of tea (+)-catechin and (-)-epicatechin. *Carbohydr. Polym.* **2016**, *140*, 362–373. <https://doi.org/10.1016/j.carbpol.2015.12.066>.
3. Cremer, D.T.; Pople, J.A. General definition of ring puckering coordinates. *J. Am. Chem. Soc.* **1975**, *97*, 1354–1358. <https://doi.org/10.1021/ja00839a011>.
4. French, A.D.; Johnson, G.P. Linkage and pyranosyl ring twisting in cyclodextrins. *Carbohydr. Res.* **2007**, *342*, 1223–1237. <https://doi.org/10.1016/j.carres.2007.02.033>.
5. Frisch, M.J.E.A.; Trucks, G.W.; Schlegel, H.B.; Scuseria, G.E.; Robb, M.A.; Cheeseman, J.R.; ... Nakatsuji, H. GAUSSIAN09, Revision A.01. Gaussian, Inc., Wallingford, CT. 2009.
6. Aree, T.; Jongrungruangchok, S. Structure–antioxidant activity relationship of  $\beta$ -cyclodextrin inclusion complexes with olive tyrosol, hydroxytyrosol and oleuropein: Deep insights from X-ray analysis, DFT calculation and DPPH assay. *Carbohydr. Polym.* **2018**, *199*, 661–669. <https://doi.org/10.1016/j.carbpol.2018.07.019>.
7. Aree, T. Understanding structures and thermodynamics of  $\beta$ -cyclodextrin encapsulation of chlorogenic, caffeic and quinic acids: Implications for enriching antioxidant capacity and masking bitterness in coffee. *Food Chem.* **2019**, *293*, 550–560. <https://doi.org/10.1016/j.foodchem.2019.04.084>.
